# Supplementary material for: Preparation of a biochar-lignosulfonate composite material and its adsorption performance for Cu 2+
Source: Royal Society of Chemistry journal article supplement (doi:10.1039/d4ra00588k), 2024-01-01
Supplement: d4ra00588k1.pdf [file d4ra00588k1.pdf]

## Support information

### Preparation of biochar-lignosulfonate composite material and its adsorption performance for Cu<sup>2+</sup>

Ying Zhang<sup>1,\*</sup>, Qi He<sup>1,#</sup>, Yonglin Yang<sup>2</sup>, Qian Bai<sup>3</sup>

<sup>1</sup>Department of chemical Power Engineering, Shenmu Vocational & Technical College, yulin 719300, shaanxi, China

<sup>1</sup>Production and operation Department, Shenmu Electrochemical Development Co.,Ltd, yulin 719300, shaanxi, China

<sup>2</sup>School of Chemistry& Chemical Engineering, Yulin University, yulin 719000, shaanxi, China

<sup>3</sup>School of Mechanical Engineering, Yulin Vocational & Technical College, yulin 719000, shaanxi, China

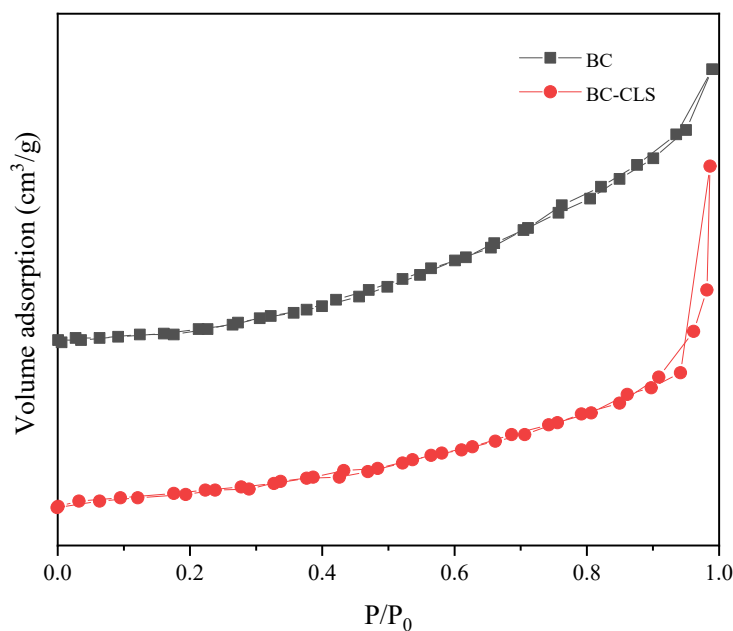

Figure S1 Nitrogen adsorption and desorption curves of BC and BC-CLS

Figure S1 shows the nitrogen adsorption/desorption isotherms and pore size distributions of BC and BC-CLS. The isotherms can be classified as type III isotherms, which indicate that there is a weak interaction force between the samples and N<sub>2</sub>. In addition, the specific surface area, total pore volume and porosity of BC and BC-CLS are listed in Table S1. From Table S1, it can be seen that the specific surface area, total pore volume and porosity of BC-CLS are slightly larger than those of BC.

Table S1 Mesoscale properties of adsorbents

| Material | Specific surface area (m <sup>2</sup> /g) | Total pore volume (cm <sup>3</sup> /g) | Porosity (%) |
|----------|-------------------------------------------|----------------------------------------|--------------|
| BC       | 6.245                                     | 0.065                                  | 4.6          |
| BC-CLS   | 7.658                                     | 0.824                                  | 7.8          |
